RESEARCH

# An in silico exploration of combining Interleukin-12 with Oxaliplatin to treat liver-metastatic colorectal cancer

Qing Wang<sup>1†</sup>, Zhijun Wang<sup>1</sup>, Yan Wu<sup>2</sup> and David J Klinke II<sup>3,4\*†</sup>

\*Correspondence:

david.klinke@mail.wvu.edu

<sup>3</sup>Department of Chemical and Biomedical Engineering and WVU Cancer Institute, West Virginia University, 25606, Morgantown, WV, USA

Full list of author information is available at the end of the article

<sup>†</sup>Equal contributor

## Abstract

**Background:** Combining anti-cancer therapies with orthogonal modes of action, such as direct cytotoxicity and immunostimulatory, hold promise for expanding clinical benefit to patients with metastatic disease. For instance, a chemotherapy agent Oxaliplatin (OXP) in combination with Interleukin-12 (IL-12) can eliminate pre-existing liver metastatic colorectal cancer and protect from relapse in a murine model. However, the underlying dynamics associated with the targeted biology and the combinatorial space consisting of possible dosage and timing of each therapy present challenges for optimizing treatment regimens. To address some of these challenges, we developed a predictive simulation platform for optimizing dose and timing of the combination therapy involving Mifepristone-induced IL-12 and chemotherapy agent OXP.

**Methods:** A multi-scale mathematical model comprised of impulsive ordinary differential equations was developed to describe the interaction between the immune system and tumor cells in response to the combined IL-12 and OXP therapy. An ensemble of model parameters were calibrated to published experimental data using a genetic algorithm and used represent three different phenotypes: responders, partial-responders, and non-responders.

**Results:** The multi-scale model captures tumor growth patterns of the three phenotypic responses observed in mice in response to the combination therapy against a tumor re-challenge and was used to explore changing the dose and timing of the mixed immune-chemotherapy on tumor growth subjected to a tumor re-challenge in mice. An increased ratio of CD8<sup>+</sup> T effectors to regulatory T cells during and after treatment was key to improve tumor control in the responder cohort. Sensitivity analysis indicates that combined OXP and IL-12 therapy worked more efficiently in responders by increased priming of T cells, enhanced CD8<sup>+</sup> T cell-mediated killing, and functional inhibition of regulatory T cells. In a virtual cohort that mimics non-responders and partial-responders, simulations show that an increased dose of OXP alone would improve the response. In addition, enhanced IL-12 expression alone or an increased number of treatment cycles of the mixed immune-chemotherapy can barely improve tumor control for non-responders and partial responders.

**Conclusions:** Overall, this study illustrates how mechanistic models can be used for in silico screening of the optimal therapeutic dose and timing in combined cancer treatment strategies.

**Keywords:** adenoviral vector; combination therapy; mathematical modeling; impulsive ordinary differential equation; stability analysis

## Background

Carcinomas of the colon or rectum, termed colorectal cancer, are the third most common cancer diagnosed in both men and women in the United States. The American Cancer Society estimates the number of new cases of colorectal cancer in the United States for 2019 at 145,600 ([1]). With 60,000 fatalities per year, colorectal cancer is second only to lung cancer as a cause of cancer-related deaths in the United States. Upon diagnosis, 10%-20% of patients have already developed liver metastases while 70% of patients with colorectal cancer ultimately develop liver metastases. Unfortunately, the prognosis for patients with liver metastatic colorectal cancer is poor because hepatectomy, palliative chemotherapy and symptomatic treatments are the only available options ([2]).

Interleukin-12 (IL-12) is a potent immunostimulatory cytokine that activates the proliferation and function of key cellular effectors of innate and adaptive immunity such as T lymphocytes and natural killer (NK) cells ([3], [4], [5]). While toxicity is a serious obstacle for use of IL-12 as a systemic therapy in humans, an attractive alternative is to use adenoviral vectors to induce expression in specific tissues. However, transgene expression tends to be transient and the efficacy of re-administration is impaired by the rapid emergence of neutralizing antibodies ([3]). To allow a good control of the strength and duration of IL-12 expression, high-capacity adenoviral vectors containing a liver-specific, Mifepristone-inducible system for the expression of murine IL-12 (HC-Ad/RUmIL-12) were recently designed to control primary or metastatic liver cancer ([6]). Since stand-alone chemo- or radiotherapeutic regimens are insufficient (with a few notable exceptions) to eradicate neoplastic lesion ([7]), HC-Ad/RUmIL-12 was combined with chemotherapy agent Oxaliplatin (OXP) to treat liver-implanted colon cancer cells ([6]). As a consequence of the combination therapy, pre-existing liver metastases of colorectal cancer were eradicated, and enhanced establishment of a protective immune response against tumor rechallenge and increased overall survival of animals were observed. In addition, a dramatic increase in the ratio of cytotoxic CD8+ T lymphocytes to immunosuppressive cell populations was detected in the tumor microenvironment ([3]).

Mathematical modeling using systems of ordinary differential equations (ODEs) can improve the design and administration of cancer treatments, especially when experimental data are incorporated ([8], [9], [10], [11], [12], [13]). In silico screening of parameter regions that seem most promising for optimal timing and dosage of therapy can be suggested using calibrated mathematical models and clinical trials can focus on those regions ([13], [14], [15], [16], [17]). For instance, a quantitative systems pharmacology model in [8] was developed to reproduce experimental data of CT26 tumor size dynamics upon administration of RT and an anti-PD-L1 agent in ([18], [19]). The calibrated model was further used as an in silico tool to predict the best treatment combination schedules and sequences. Over the past years, a variety of ODE-based mathematical models have been developed to better understand cancer progression and response to immunotherapy (see details in [20],[21],[22], [23], [24], [25]). In exploring immunotherapy in combination with other treatment modalities, de Pillis *et. al* developed an ODE model governing cancer growth on a cell population level with a combination of immuno-chemotherapy treatments ([26],[27], [28], [29]). In addition, Kim and colleagues formulated a mathematical model of therapy

with oncolytic viruses that simultaneously express immunostimulatory cytokines and costimulatory molecules ([12]). Inspired by these studies, we developed an impulsive ODE model to represent the interaction between tumor and immune system in response to the chemotherapy drug OXP combined with liver-specific expression of IL-12 therapy to explore therapeutic options in the context of liver metastatic colorectal cancer. The current model extends the impulsive ODE model in [13] that only considered an immunotherapy initiated by an adenovirus vaccination to stimulate a tumor-associated antigen-specific T cell response.

The structure of this paper is as follows. First, we present a multi-scale mechanistic model of anti-tumor immunity and tumor growth in response to a combined immuno-chemotherapy using a set of impulsive ODEs. Second, we describe how we calibrated the model parameters against published experimental data using a genetic algorithm. Next we investigate the stability of tumor-free and high tumor equilibria based on the linearized system. Then we study how alter parameter values may change the tumor growth dynamics. Finally, we used the simulation platform to explore potential ways to improve treatment regimes for non-responders and partial responders.

## Methods

Our method was to develop a multi-scale impulsive ODE model based on our understanding of the corresponding biology, which is described in the following paragraphs. Numerical solutions of the model were obtained using simulators generated by C Sharp. The resulting mechanistic mathematical model was calibrated against existing experimental data.

A genetic algorithm was used to find parameter sets that closely match the experimental data in [6]. Each parameter set was modeled using an individual chromosome in order to apply the algorithm to search in the parameter space. For each generation, the impulsive ODE set was solved using the Runge-Kutta method of order four for each individual or parameter set ([30]). The fitness function value, or variance, was calculated using the sum of error squared between experimental data and corresponding model predictions. To reduce the dependence of our model predictions about optimal treatment strategies for the combined therapy on any individual calibrated set of parameter values, we generated an ensemble of 30 parameter sets for each phenotypic cohort (i.e., responder, partial responder, and non-responder) that generated similar good fits against the experimental data. The simulation results using these ensemble of parameter sets were characterized in terms of the mean, 90th percentile upper, and lower predicted responses. Simulations start on day 0, which corresponds to the time of tumor implantation. At the initial time point, we assume that there is no activated tumor specific effector T cells present in the blood and at the site of the tumor. The calibrated mechanistic model was then used to investigate the long-term behavior through stability analysis. Details of model development, parameter calibration, goodness of fit, difference between major variables of immune response of responder mice, partial responder mice, and non-responder mice after the combination treatment, and local stability analysis are discussed in the following subsections.

## Results

A multi-scale model of tumor growth subject to IL-12 and OXP therapy

Our mathematical model is based on the experimental data presented by Manuela Gonzalez-Aparicio and collaborators in [6] using the MC38Luc1 cell lines for murine metastatic colorectal cancer. Using this mouse model, OXP and IL-12 combination therapy eradicated pre-existing liver metastases, established a protective immune response against tumor rechallenge, and increased overall survival of animals. To better understand the dynamics of the primary response to adenovirus-mediated induction of an anti-tumor immune response, we developed a three-compartment mathematical model to quantify the cytotoxic CD8<sup>+</sup> T cell response to IL-12 and OXP combined therapy and subsequent inhibition of tumor cell growth, as shown schematically in Figure 1. Among these three compartments, we consider the dynamics of fifteen state variables that are regulated by the following governing biological processes and assumptions:

- 1). **Naïve CD8<sup>+</sup> T cells ( $T_N$ , units: cells per mm<sup>3</sup>).** We assume that naïve CD8<sup>+</sup> T cells are produced at a constant rate  $c_1$  from thymus and die naturally at a rate  $k_{d1} \cdot T_N$  ([31]). Naïve T cells are recruited and activated by tumor antigens presented by APC<sub>1</sub> (antigen-presenting cells in lymph node) at a rate  $c_2 \cdot T_N \cdot \frac{APC_1}{APC_1 + g_1}$  ([32], [33], [34]).

$$\frac{dT_N}{dt} = c_1 - k_{d1} \cdot T_N - c_2 \cdot T_N \cdot \frac{APC_1}{APC_1 + g_1} \quad (1)$$

- 2). **Effector CD8<sup>+</sup> T cells in lymph node ( $T_{E1}$ , units: cells per mm<sup>3</sup>).** The increase in the rate of concentration of effector CD8<sup>+</sup> T cells in the lymph node due to activation of naïve CD8<sup>+</sup> T cells from the blood stream is given by  $c_2 \cdot \frac{T_N \text{Vol}_b}{\text{Vol}_{ln}} \cdot \frac{APC_1}{APC_1 + g_1}$ , where  $\text{Vol}_b = 1.4 * 10^3 \text{ mm}^3$  is the volume of the blood compartment ([35]) and  $\text{Vol}_{ln} = 0.25 \text{ mm}^3$  is the volume of the lymph node compartment ([36]). We assume that the natural death of effector T cells in the lymph node is negligible. Effector CD8<sup>+</sup> T cells in the lymph node proliferate at a rate proportional to  $T_{E1}$ , a saturable term that represents antigen presenting cells (APC) and defined by  $\frac{APC_1}{APC_1 + g_2}$ , and an immune checkpoint term defined by  $\frac{\alpha}{\alpha + T_{E1}^2}$ , where  $\alpha$  is the square root of the saturation constant of  $T_{E1}$  ([37]). We also assume that influx rate of effector T cells from blood to lymph node is  $a_{21} \cdot \frac{T_{E2} \text{Vol}_b}{\text{Vol}_{ln}}$ , where  $T_{E2}$  is the concentration of T effectors in blood, and  $a_{12} \cdot T_{E1}$  is the efflux rate. We assume that  $T_{E1}$  cells are killed by chemotherapy agent OXP<sub>1</sub> (Oxaliplatin in lymph node) at the rate  $k_{d2} \cdot \frac{T_{E1} \cdot \text{OXP}_1}{\text{OXP}_1 + g_3}$ .

$$\begin{aligned} \frac{dT_{E1}}{dt} = & c_2 \cdot \frac{T_N \text{Vol}_b}{\text{Vol}_{ln}} \cdot \frac{APC_1}{APC_1 + g_1} + k_{p1} \cdot T_{E1} \cdot \frac{APC_1}{APC_1 + g_2} \cdot \frac{\alpha}{\alpha + T_{E1}^2} \\ & + a_{21} \cdot \frac{T_{E2} \text{Vol}_b}{\text{Vol}_{ln}} - a_{12} \cdot T_{E1} - k_{d2} \cdot \frac{T_{E1} \cdot \text{OXP}_1}{\text{OXP}_1 + g_3} \end{aligned} \quad (2)$$

- 3). **Antigen Presenting Cells in lymph node (APC<sub>1</sub>, units: cells per mm<sup>3</sup>).** We assume that APCs in the lymph node have a natural death rate of  $k_{d3} \cdot APC_1$  and the influx rate of APCs from tumor to lymph node is

$b_{31} \cdot \text{APC}_3 \cdot \frac{\text{Vol}_t}{\text{Vol}_{ln}}$ , where  $\text{APC}_3$  is the concentration of APCs in tumor,  $\text{Vol}_t = \frac{\epsilon + C(t)}{1 - V_i \cdot T_{E3}}$  (since  $\text{Vol}_t = \epsilon + C(t) + V_i \cdot T_{E3} \cdot \text{Vol}_t$ , where  $T_{E3}$  is the concentration of T effectors in tumor) is the volume of the tumor compartment,  $\epsilon$  is a small positive constant representing a small volume of tissue that excludes tumor and effector  $\text{CD8}^+$  T cells in the tumor compartment, where  $C(t)$  is the volume of tumor cells in  $\text{mm}^3$ . The total volume of tumor cells is comprised of the volumes of major histocompatibility complex (MHC) class I positive tumor cells ( $C_{MHC I+}$ ) and MHC class I negative tumor cells ( $C_{MHC I-}$ ). The average size of a T effector cell ( $V_i$ ) is equal to  $10^{-7} \text{mm}^3$  ([38]).

$$\frac{d\text{APC}_1}{dt} = -k_{d3} \cdot \text{APC}_1 + b_{31} \cdot \text{APC}_3 \cdot \frac{\text{Vol}_t}{\text{Vol}_{ln}} \quad (3)$$

- 4). **Chemotherapy agent Oxaliplatin in lymph node ( $\text{OXP}_1$ , units: mg per kg)**. We assume that OXP decays naturally at a rate  $k_{d4} \cdot \text{OXP}_1$  and the influx rate of Oxaliplatin (OXP) from blood to lymph node is  $c_{21} \cdot \frac{\text{OXP}_2 \text{Vol}_b}{\text{Vol}_{ln}}$ , where  $\text{OXP}_2$  is the concentration of OXP in blood.

$$\frac{d\text{OXP}_1}{dt} = -k_{d4} \cdot \text{OXP}_1 + c_{21} \cdot \frac{\text{OXP}_2 \text{Vol}_b}{\text{Vol}_{ln}} \quad (4)$$

- 5). **Effector  $\text{CD8}^+$  T cells in blood ( $T_{E2}$ , units: cells per  $\text{mm}^3$ )**. We assume the effector  $\text{CD8}^+$  T cells die naturally at a rate  $k_{d5} \cdot T_{E2}$  in blood. The influx rate of effector  $\text{CD8}^+$  T cells from lymph node to blood is equal to  $a_{12} \cdot \frac{T_{E1} \text{Vol}_{ln}}{\text{Vol}_b}$  and the efflux rate of effector  $\text{CD8}^+$  T cells from blood to lymph node is equal to  $a_{21} \cdot T_{E2}$ . The influx rate of  $\text{CD8}^+$  T effectors from the tumor to blood is  $a_{32} \cdot \frac{C_{MHC I-}}{\epsilon + C(t)} \cdot \frac{T_{E3} \text{Vol}_t}{\text{Vol}_b}$ , where  $T_{E3}$  is the concentration of T effectors in tumor and the efflux rate of  $\text{CD8}^+$  T effectors from blood to tumor is  $a_{23} \cdot T_{E2}$ .

$$\begin{aligned} \frac{dT_{E2}}{dt} = & -k_{d5} \cdot T_{E2} + a_{12} \cdot \frac{T_{E1} \text{Vol}_{ln}}{\text{Vol}_b} - a_{21} \cdot T_{E2} - a_{23} \cdot T_{E2} \\ & + a_{32} \cdot \frac{C_{MHC I-}}{\epsilon + C(t)} \cdot \frac{T_{E3} \text{Vol}_t}{\text{Vol}_b} \end{aligned} \quad (5)$$

- 6). **Antigen Presenting Cells in blood ( $\text{APC}_2$ , units: cells per  $\text{mm}^3$ )**. A logistic growth pattern  $r_2 \cdot \text{APC}_2 \cdot \left(1 - \frac{\text{APC}_2}{K}\right)$  is used for APCs in blood where  $r_2$  is the growth rate constant and  $K$  is the carrying capacity. We assume a  $b_{23} \cdot \text{APC}_2$  efflux rate of APCs from blood to tumor.

$$\frac{d\text{APC}_2}{dt} = r_2 \cdot \text{APC}_2 \cdot \left(1 - \frac{\text{APC}_2}{K}\right) - b_{23} \cdot \text{APC}_2 \quad (6)$$

- 7). **Chemotherapy agent Oxaliplatin in blood ( $\text{OXP}_2$ , units: mg per kg)**. We assume that OXP decays naturally at a rate  $k_{d4} \cdot \text{OXP}_2$  and the efflux rates of OXP from blood to lymph node and from blood to tumor are  $c_{21} \cdot \text{OXP}_2$  and  $c_{23} \cdot \text{OXP}_2$ , respectively. The source of OXP is provided by each administration whose dose and time are reflected by the discrete equation

(17).

$$\frac{d\text{OXP}_2}{dt} = -k_{d4} \cdot \text{OXP}_2 - c_{21} \cdot \text{OXP}_2 - c_{23} \cdot \text{OXP}_2 \quad (7)$$

- 8). **Effector CD8<sup>+</sup> T cells in tumor microenvironment ( $T_{E3}$ , units: cells per mm<sup>3</sup>).** We assume that effector CD8<sup>+</sup> T cells can proliferate locally upon recognition of the corresponding tumor antigen presented by MHC class I positive tumor cells upon IL-12 stimulation and subject to suppression from T regulatory cells at a saturable rate equal to  $k_{p2} \cdot \frac{C_{MHCI+}}{\epsilon + C(t)} \cdot \frac{\text{IL}}{\text{IL} + g_4} \cdot \frac{T_{E3}}{T_R + g_5}$ , where IL is the concentration of IL-12 and  $T_R$  is the concentration of regulatory T cells ([39], [40]). The influx rate of effector CD8<sup>+</sup> T cells from the blood to tumor is defined by  $a_{23} \cdot \frac{T_{E2} \text{Vol}_b}{\text{Vol}_t}$ . The efflux rate of effector CD8<sup>+</sup> T cells from the tumor to blood is  $a_{32} \cdot T_{E3} \cdot \frac{C_{MHCI-}}{\epsilon + C(t)}$ . Effector T cells have a finite lifespan and die within the tumor microenvironment at a rate equal to  $k_{d6} \cdot T_{E3}$ . T effector cells in tumor are assumed to be killed by chemotherapy agent OXP in tumor (OXP<sub>3</sub>) at the rate  $k_{d2} \cdot T_{E3} \cdot \frac{\text{OXP}_3}{\text{OXP}_3 + g_6}$ .

$$\begin{aligned} \frac{dT_{E3}}{dt} = & a_{23} \cdot \frac{T_{E2} \text{Vol}_b}{\text{Vol}_t} - a_{32} \cdot T_{E3} \cdot \frac{C_{MHCI-}}{\epsilon + C(t)} + k_{p2} \cdot \frac{C_{MHCI+}}{\epsilon + C(t)} \cdot \frac{\text{IL}}{\text{IL} + g_4} \\ & \cdot \frac{T_{E3}}{T_R + g_5} - k_{d6} \cdot T_{E3} - k_{d2} \cdot T_{E3} \cdot \frac{\text{OXP}_3}{\text{OXP}_3 + g_6} \end{aligned} \quad (8)$$

- 9). **Interferon gamma (IFN<sub>γ</sub>, units: pg per mm<sup>3</sup>).** We assume that IFN<sub>γ</sub> is secreted solely by effector CD8<sup>+</sup> T cells within the tumor with stimulation from IL-12 and inhibition from regulatory T cells ([41]) at a rate of  $c_4 \cdot \frac{\text{IL}}{\text{IL} + g_7} \cdot \frac{T_{E3}}{T_R + g_8}$ . While this assumption may not hold in all model systems, the presence of IFN<sub>γ</sub> in the tumor was dependent on CD8<sup>+</sup> T cell activation [42]. IFN<sub>γ</sub> decays at a rate proportional to its concentration with a rate constant  $k_{d7}$ .

$$\frac{d\text{IFN}_\gamma}{dt} = -k_{d7} \cdot \text{IFN}_\gamma + c_4 \cdot \frac{\text{IL}}{\text{IL} + g_7} \cdot \frac{T_{E3}}{T_R + g_8} \quad (9)$$

- 10). **Antigen Presenting Cells in tumor (APC<sub>3</sub>, units: cells per mm<sup>3</sup>).** We assume that APCs in the tumor microenvironment have a natural death rate of  $k_{d3} \cdot \text{APC}_3$ , the influx rate of APCs from blood to tumor is  $b_{23} \cdot \text{APC}_2 \cdot \frac{\text{Vol}_b}{\text{Vol}_t}$  and APCs take tumor antigen in tumor microenvironment and migrate to the lymph node to present tumor antigens to T cells at the rate of  $b_{31} \cdot \text{APC}_3$ .

$$\frac{d\text{APC}_3}{dt} = b_{23} \cdot \text{APC}_2 \cdot \frac{\text{Vol}_b}{\text{Vol}_t} - b_{31} \cdot \text{APC}_3 - k_{d3} \cdot \text{APC}_3 \quad (10)$$

- 11). **Interleukin-12 (IL, units: ng per ml).** Interleukin-12 (IL-12) is produced by APCs at a rate of  $c_5 \cdot \text{APC}_3$  and decays naturally at a rate of  $k_{d8} \cdot \text{IL}$ . The extra IL-12 expression obtained through the combined therapy is approximated using a discrete equation (16).

$$\frac{d\text{IL}}{dt} = c_5 \cdot \text{APC}_3 - k_{d8} \cdot \text{IL} \quad (11)$$

- 12). **Chemotherapy agent Oxaliplatin in tumor ( $OXP_3$ , units: mg per kg)**. We assume that OXP decays naturally at a rate  $k_{d4} \cdot OXP_3$  and the influx rate of OXP from blood to tumor is  $c_{23} \cdot \frac{OXP_2 \cdot Vol_b}{Vol_t}$ .

$$\frac{dOXp_3}{dt} = -k_{d4} \cdot OXP_3 + c_{23} \cdot \frac{OXp_2 \cdot Vol_b}{Vol_t} \quad (12)$$

- 13). **Regulatory T cells ( $T_R$ , units: cells per  $mm^3$ )**. Regulatory T cells are produced at a constant rate  $c_6$  from thymus and die naturally at a rate  $k_{d9} \cdot T_R$ . We assume that regulatory T cells proliferate at a rate of  $k_{p3} \cdot \frac{C_{MHCI-}}{\epsilon + C(t)} \cdot \frac{T_{E3}}{T_{E3} + g_9} \cdot \frac{T_R}{\mathbb{I}L + g_{10}}$  ([3], [4], [6]).

$$\frac{dT_R}{dt} = c_6 - k_{d9} \cdot T_R + k_{p3} \cdot \frac{C_{MHCI-}}{\epsilon + C(t)} \cdot \frac{T_{E3}}{T_{E3} + g_9} \cdot \frac{T_R}{\mathbb{I}L + g_{10}} \quad (13)$$

- 14). **MHC class I positive tumor cells ( $C_{MHCI+}$ , units:  $mm^3$ )**. MHC class I positive tumor cells are converted from MHC class I negative tumor cells ( $C_{MHCI-}$ ) with the assistance of  $IFN_\gamma$  at a rate  $c_7 \cdot \frac{IFN_\gamma}{IFN_\gamma + g_{11}} \cdot C_{MHCI-}$  and the rate of effector CD8+ T cell-mediated killing of MHC class I positive tumor cells is  $k_{d11} \cdot \left(1 + \frac{OXp_3}{OXp_3 + g_{12}}\right) \cdot \frac{C_{MHCI+}}{\epsilon + C(t)} \cdot \frac{T_{E3}}{T_R + g_{13}}$  ([6], [31]). We assume that the dilution rate of MHC class I positive tumor cells due to proliferation is  $k_{p4} \cdot C_{MHCI+}$ . The natural death rate of MHC class I positive tumor cells is assumed to be  $k_{d10} \cdot C_{MHCI+}$  and MHC class I positive tumor cells are killed by chemotherapy agent OXP in tumor at a rate  $k_{d2} \cdot C_{MHCI+} \cdot \frac{OXp_3}{OXp_3 + g_{14}}$ .

$$\begin{aligned} \frac{dC_{MHCI+}}{dt} = & c_7 \cdot \frac{IFN_\gamma}{IFN_\gamma + g_{11}} \cdot C_{MHCI-} - k_{d10} \cdot C_{MHCI+} \\ & - k_{d11} \cdot \frac{C_{MHCI+}}{\epsilon + C(t)} \cdot \left(1 + \frac{OXp_3}{OXp_3 + g_{12}}\right) \cdot \frac{T_{E3}}{T_R + g_{13}} \\ & - k_{p4} \cdot C_{MHCI+} - k_{d2} \cdot C_{MHCI+} \cdot \frac{OXp_3}{OXp_3 + g_{14}} \end{aligned} \quad (14)$$

- 15). **MHC class I negative tumor cells ( $C_{MHCI-}$ , units:  $mm^3$ )**. MHC class I negative tumor cells are converted to MHC class I positive tumor cells with the assistance of  $IFN_\gamma$  at a rate of  $c_7 \cdot \frac{IFN_\gamma}{IFN_\gamma + g_{11}} \cdot C_{MHCI-}$ . We assume that the proliferation rate of MHC class I positive tumor cells is equal to  $2 \cdot k_{p4} \cdot C_{MHCI+}$ . As MHC class I positive tumor cells proliferate, they lose MHC class I expression and become MHC class I negative cells. A logistic growth pattern is assumed for the number of MHC class I negative tumor cells in the absence of treatment. We assume that the natural death rate of MHC class I negative tumor cells is  $k_{d10} \cdot C_{MHCI-}$  and these cells are killed by chemotherapy agent OXP in tumor at a rate  $k_{d2} \cdot C_{MHCI-} \cdot \frac{OXp_3}{OXp_3 + g_{15}}$ . The difference in size of tumor cells caused by tumor rechallenge is described by

discrete equation (18).

$$\begin{aligned} \frac{dC_{MHCI^-}}{dt} = & -c_7 \cdot \frac{IFN_\gamma}{IFN_\gamma + g_{11}} \cdot C_{MHCI^-} - k_{d10} \cdot C_{MHCI^-} \\ & + k_{p4} \cdot C_{MHCI^-} - r_1 \cdot C_{MHCI^-}^2 + 2 \cdot k_{p4} \cdot C_{MHCI^+} \\ & - k_{d2} \cdot C_{MHCI^-} \cdot \frac{OXP_3}{OXP_3 + g_{15}} \end{aligned} \quad (15)$$

- 16). We use the following difference equations to reflect the abrupt change of IL-12 concentration and OXP concentration due to therapy and sudden change the size of MHC class I negative tumor due to tumor rechallenge.

$$\Delta IL(t) = IL_{k1}, \quad t = t_{k1}, \quad k1 = 1, 2, \dots, n_1 \quad (16)$$

$$\Delta OXP_2(t) = \{OXP_2\}_{k2}, \quad t = t_{k2}, \quad k2 = 1, 2, \dots, n_2 \quad (17)$$

$$\Delta C_{MHCI^-}(t) = C_{k3}, \quad t = t_{k3}, \quad k3 = 1, 2, \dots, n_3 \quad (18)$$

where  $\Delta IL(t) = IL(t^+) - IL(t^-)$  and  $\Delta OXP_2(t) = OXP_2(t^+) - OXP_2(t^-)$  reflect the abrupt changes of IL-12 and oxaliplatin at administration times  $t_{k1}$  and  $t_{k2}$ , while  $IL_{k1}$  and  $\{OXP_2\}_{k2}$  are the dosages of IL-12 and oxaliplatin at the administration times  $t_{k1}$  and  $t_{k2}$  with  $k1 = 1, 2, \dots, n_1$  and  $k2 = 1, 2, \dots, n_2$ , respectively;  $\Delta C_{MHCI^-}(t) = C_{MHCI^-}(t^+) - C_{MHCI^-}(t^-)$  represents the sudden changes in tumor size due to tumor rechallenge with implantation size  $C_{k3} \text{ mm}^3$  at time  $t_{k3}$  with  $k3 = 1, 2, \dots, n_3$ .

A schematic diagram summarizing this three compartmental model is shown in Figure 1. Model parameters and their meaning are listed in Table 1.

#### Non-negativity of solutions to the model

For any mathematical model that has biological implications, it is important to make sure that solutions are non-negative all the time. For our model, we can see that solutions of system comprised of equations 1) - 15) starting from non-negative initial conditions will remain non-negative because  $\frac{dx_i}{dt} \geq 0$  for  $x_i = 0$  and  $x_j \geq 0$  where  $i, j = 1, 2, \dots, 15$  and  $i \neq j$  with positive impulsive inputs  $IL_{k1}$ ,  $\{OXP_2\}_{k2}$ , and  $C_{k3}$  at impulsive moments  $t_{k1}$ ,  $t_{k2}$  and  $t_{k3}$ .

#### Model calibration

Therapeutic use of IL-12 requires efficient methods to control the plasma concentration of this potent immuno-stimulatory cytokine in order to avoid toxicity ([6]). It was determined in an MC38 syngeneic tumor model that a blood concentration of IL-12  $< 20 \text{ ng/ml}$  has no anti-tumor effect, while concentrations  $> 700 \text{ ng/ml}$  are associated with toxicity ([43]). Gonzalez-Aparicio and his colleagues designed a new induction protocol to keep IL-12 within this therapeutic range ([6]). Once the liver of a group of C57BL/6 mice was transduced with the vector (typically  $2.5 \cdot 10^8$  IU), a suboptimal amount of Mif ( $125 \text{ } \mu\text{g/kg}$ ) is administered for the first 2 days in order to prevent toxicity. The concentration of IL-12 is measured in serum 10 h after the first induction, and based on this information, a stepwise increase in Mif is scheduled to allow several cycles of sustained IL-12 expression in mice treated with



the HC-Ad/RUmIL-12 vector (Figure 2). Before we start the calibration of model parameters, we first quantified the IL-12 concentration as a function of time in days (Fig. 2A) and Mifepristone (Fig. 2B) respectively. Empirical functions were used to represent the IL-12 as a function of time and as a function of Mifepristone dose. These calibrated functions are shown in Figure 2, where they are compared against the experimental data reported in ([6]). Overall, the curves show a good match between experimental data and model predictions used to describe Mif-induced IL-12 treatment effects. The authors in [6] verified the Mif-induction system is functional for more than 5 months with a slow decrease in the intensity of expression in each cycle owing to the non-integrative nature of adenoviral vectors. For simplicity, we used the same relationships for each Mif-induced treatment cycle.

We then calibrated model parameters in system described by equations 1) - 15) using two sets of experimental data from the paper ([6]). The first sets of data are listed below:

- Total volume of MC38Luc1 tumor cells was calibrated against data shown in Figures 2(B), 2(C), 3 (IL-12 + OXP group).
- Concentration of Interferon gamma was obtained from Figure 4(B) (IL-12 + OXP group).
- The ratio between CD8<sup>+</sup> T lymphocytes and T regulatory cells was obtained from Figure 5(B) (experimental results for IL-12 + OXP group in tumor).

The model was calibrated to these data to reflect the effects of one cycle of Mif-induced IL-12 production combined with chemotherapy drug OXP injection to treat the primary injection of  $5 \times 10^5$  MC38Luc1 tumor cells into the liver as well as the immunological protection against cancer cells treated with the IL-12 plus OXP combined therapy after a tumor rechallenge with  $10^6$  MC38Luc1 tumor cells about 35 days after the completion of the previous combined treatment. Calibration results, including the median (solid blue curve), 90th percentile upper (dashed purple curve), and 90th percentile lower responses (dashed green curve) of 30 good fits, are included in Figure 3A), where  $C_{MHCI-}(0) = 1 \text{ mm}^3$  since  $t_0 = 0$  is the day that  $5 \times 10^5$  cells/mouse MC38Luc1 tumor cells were inoculated in the liver of C57BL/6 mice ([44, 45]),  $T_N(0) = 0.0714 \text{ cells per mm}^3$  ( $= \frac{100}{1.4 \times 10^3}$  as we assume that the number of naïve CD8<sup>+</sup> T cells in a mouse is 100 and the volume of the blood system of a mature mouse is  $1.4 \times 10^3 \text{ mm}^3$ ),  $APC_2(0) = 214.2857$  ( $= \frac{3 \times 10^5}{1.4 \times 10^3}$ ) cells per  $\text{mm}^3$  according to [46]. Other initial values are zero:  $T_{Ei}(0) = C_{MHCI+}(0) = OXP_i(0) = IFN_\gamma(0) = APC_1(0) = APC_3(0) = T_R(0) = IL(0) = 0$  for  $i = 1, 2, 3$ .  $\Delta C_{MHCI-}(57) = 2 \text{ mm}^3$ ,  $\Delta OXP_2(s) = 5 \text{ mg/kg}$  with  $s = 10, 34, 100$ ;  $\Delta IL(t)$  follows  $f(t) = \frac{13.6127*(t-12)^2 + 0.8606*(t-12) + 1}{0.313*(t-12)^2 - 0.6216*(t-12) + 1}$  for  $12 \leq t \leq 21$  (see details in Fig. 2A). The parameter values used in the simulations are listed in Table 2 with biological meanings of each parameter listed in Table 1.

To show the long-term management of colorectal cancer using the combined therapy, tumor growth of a group of mice subjected to one cycle of treatment was calibrated to data from Figure 7(D) in [6]. In the combined therapy, 5 mg/kg OXP on day 100 and 10-day IL-12 induction starting day 103, which follows the adjusted protocol as described in Figure 2, were administered after a tumor rechallenge on day 75. This treatment occurred about two weeks after the mice survived two cycles of combined treatments with 10-day Mif-induced IL-12 (induction started

on days 13 and 37) and OXP treatments (5mg/kg on days 10 and 34), which in turn started about two weeks after the initial implantation of MC38Luc1 tumor cells on day 0. The experimental results were split into responders (Fig. 3B), partial responders (Fig. 3C) and non-responders (Fig. 3D) groups. The mathematical model was calibrated separately to these different response groups. Figures 3B - 3D with the median (solid blue curve), 90th percentile upper (dashed purple curve), and 90th percentile lower responses (dashed green curve) of 30 good fits illustrate the results of our simulations compared with the corresponding experimental data. Here, we have  $\Delta C_{MHCI}-(75) = 2 \text{ mm}^3$ ,  $\Delta OXP_2(9) = 5 \text{ mg/kg}$ ;  $\Delta IL(t)$  follows  $IL(t) = \frac{13.6127*(t-a)^2+0.8606*(t-a)+1}{0.313*(t-a)^2-0.6216*(t-a)+1}$  for  $a \leq t \leq a + 9$  with  $a = 13, 37, 103$ . A sample set of parameter values for each of the response groups of mice used in the simulations are listed in Table 2.

*Difference in treatment efficacy: non-responders versus responders* While both the responders and non-responders survived two cycles of combination therapy treatment before tumor rechallenge and then underwent the third cycle following the tumor rechallenge on day 75, the simulations in Figs. 3B - 3D suggest that the non-responders show near zero concentration of  $IFN_\gamma$  and near zero ratio of  $T$  effectors to regulatory T cells in the tumor all the time comparing to a stable concentration of  $IFN_\gamma$  and ratio of  $T$  effectors to regulatory T cells in the tumor (at least  $10^3$  cells per  $\text{mm}^3$  after the combination therapy treatment) in responders and partial responders. The simulations also indicate that whether the immune system can maintain a high ratio of T effectors to regulatory T cells in the tumor as well as generating a moderate but stable concentration of  $IFN_\gamma$  might be crucial to control tumor growth. This finding is consistent with results from experimental studies ([7], [47]).

### Goodness of fit

Descriptions of model parameters are shown in Table 1. A couple of sample sets of estimated values of parameters obtained through fitting predictions of the impulsive ODE model 1) - 18) to data from a group of experiments in [6] are listed in Table 2. Figure 3A illustrates the comparison between model solutions and experimental measurements on tumor control and immunological protection against cancer cells in animals treated with IL-12 plus OXP. Experimental results for long-term management of colorectal cancer by observing cooperation of IL-12 and OXP for the control of experimental relapses in distant locations are compared against model predictions in Figures 3B, 3C, and 3D for responders, partial-responders and non-responders, respectively. Trajectories of tumor growth,  $IFN_\gamma$  and ratio of  $T_{E3}$  to  $T_R$  arising from the model are extremely close to corresponding data from the experiments. For each calibration, an excess of data points (57, 65, 58, 84 for Figures 3A - 3D, respectively) relative to the number of parameters (48) suggests that the model is identifiable in theory.

### Model stability analysis

In this section, we discuss local stability of equilibria of the model using linearized system evaluated at these points. We found that system comprised of equations (1) - (15) has a tumor-free equilibrium  $\vec{X}_0$ , a second tumor free equilibrium  $\vec{X}_1$  when

APC<sub>2</sub> growth rate is larger than the rate constant for APC<sub>2</sub> flowing from blood to tumor (i.e.,  $r_2 > b_{23}$ ), and a high tumor equilibrium  $\vec{X}_2$  when proliferation rate of tumor cells is higher than natural death rate of tumor cells (i.e.,  $k_{p4} > k_{d10}$ ).

By setting the right hand sides of the equation system (1) - (15) to zero and solving the equations simultaneously, we obtain

$$\begin{aligned}\vec{X}_0 &= (T_N, T_{E1}, APC_1, OXP_1, T_{E2}, APC_2, OXP_2, T_{E3}, IFN_\gamma, APC_3, IL, \\ &\quad OXP_3, T_R, C_{MHCI}^+, C_{MHCI}^-)^T \\ &= \left(\frac{c_1}{k_{d1}}, 0, 0, 0, 0, 0, 0, 0, 0, 0, \frac{c_6}{k_{d9}}, 0, 0\right)^T, \\ \vec{X}_1 &= (T_N, T_{E1}, APC_1, OXP_1, T_{E2}, APC_2, OXP_2, T_{E3}, IFN_\gamma, APC_3, IL, \\ &\quad OXP_3, T_R, C_{MHCI}^+, C_{MHCI}^-)^T \\ &= \left(T_N, T_{E1}, \frac{b_{23}Vol_b K(r_2 - b_{23})}{r_2 k_{d3} Vol_{in}}, 0, T_{E2}, \frac{K(r_2 - b_{23})}{r_2}, 0, T_{E3}, IFN_\gamma, APC_3, IL, \right. \\ &\quad \left. 0, \frac{c_6}{k_{d9}}, 0, 0\right)^T,\end{aligned}$$

where  $T_{E1}$  satisfies the following polynomial equation

$$\begin{aligned}\frac{a_{12}k_{d5}}{a_{21}+k_{d5}}T_{E1}^3 + \frac{Vol_b}{Vol_{in}}(k_{d1}T_N - c_1)T_{E1}^2 + \alpha\left(\frac{a_{12}k_{d5}}{a_{21}+k_{d5}} - k_{p1}\frac{APC_1}{APC_1+g_2}\right)T_{E1} \\ + \alpha\frac{Vol_b}{Vol_{in}}(k_{d1}T_N - c_1) = 0,\end{aligned}$$

(Based on the Descartes' rule, there is only one positive solution from the equation),

$T_{E2} = \frac{a_{12}Vol_{in}T_{E1}}{(k_{d5}+a_{21})Vol_b}$ ,  $T_{E3}$  satisfies the following quadratic equation

$$k_{d6}V_iT_{E3}^2 + k_{d6}\varepsilon T_{E3} - a_{23}Vol_bT_{E2} = 0$$

which has only one positive solution  $T_{E3} = \frac{-\varepsilon k_{d6} + \sqrt{(\varepsilon k_{d6})^2 + 4a_{23}V_i k_{d6}Vol_bT_{E2}}}{2V_i k_{d6}}$ ,  $IFN_\gamma = \frac{c_4T_{E3}IL}{k_{d7}(IL+g_7)(T_R+g_8)}$ ,  $APC_3 = \frac{b_{23}APC_2Vol_b}{(k_{d3}+b_{31})Vol_t}$ ,  $IL = \frac{c_5APC_3}{k_{d8}}$ , and

$$\begin{aligned}\vec{X}_2 &= (T_N, T_{E1}, APC_1, OXP_1, T_{E2}, APC_2, OXP_2, T_{E3}, IFN_\gamma, APC_3, IL, \\ &\quad OXP_3, T_R, C_{MHCI}^+, C_{MHCI}^-)^T \\ &= \left(\frac{c_1}{k_{d1}}, 0, 0, 0, 0, 0, 0, 0, 0, 0, \frac{c_6}{k_{d9}}, 0, \frac{k_{p4}-k_{d10}}{r_1}\right)^T.\end{aligned}$$

By simple calculation, thirteen of the fifteen eigenvalues of the Jacobian matrix of linearized system at the equilibrium  $\vec{X}_0$  are listed below

$$\begin{aligned}\{-k_{d1}, -k_{d3}, -k_{d4}, -k_{d4}, -b_{23} + r_2, -k_{d4} - c_{21} - c_{23}, -k_{d6}, -k_{d7}, \\ -b_{31} - k_{d3}, -k_{d8}, -k_{d9}, -k_{d10} - k_{p4}, -k_{d10} + k_{p4}\}\end{aligned}$$

The rest of the eigenvalues are obtained from solving the following quadratic equation:

$$\lambda^2 + (k_{d5} + a_{12} + a_{21} + a_{23})\lambda + a_{12}(k_{d5} + a_{23}) = 0.$$

It is easy to see that both eigenvalues are in the left half of the complex plane for a wide range of the parameters. Thus the first tumor free equilibrium  $\vec{X}_0$  is stable if both  $r_2 < b_{23}$  (i.e., APC<sub>2</sub> growth rate is smaller than the rate constant for APC<sub>2</sub>

flowing from blood to tumor) and  $k_{p4} < k_{d10}$  (i.e., tumor proliferation rate is less than tumor natural death rate), otherwise it is unstable.

The second tumor free equilibrium  $\vec{X}_1$  exists when  $r_2 > b_{23}$  (i.e., APC<sub>2</sub> growth rate is larger than the rate constant for APC<sub>2</sub> flowing from blood to tumor). Similar to the previous case, most of the eigenvalues of the Jacobian matrix at  $\vec{X}_1$  are in the left-half of the complex plane. It is easy to see that twelve of the fifteen eigenvalues are negative. With respect to the remaining three, one is  $b_{23} - r_2$ , and the other two satisfies the following quadratic equation

$$\lambda^2 + \left( \frac{c_7 IFN_\gamma}{IFN_\gamma + g_{11}} + \frac{k_{d11} TE_3}{\varepsilon(T_R + g_{13})} + 2k_{d10} \right) \lambda + \left( -k_{d10} - k_{p4} - \frac{k_{d11} TE_3}{\varepsilon(T_R + g_{13})} \right) \times \left( -k_{d10} + k_{p4} - \frac{c_7 IFN_\gamma}{IFN_\gamma + g_{11}} \right) - 2k_{p4} \frac{c_7 IFN_\gamma}{IFN_\gamma + g_{11}} = 0.$$

It is found that both eigenvalues are in the left-half of the complex plane if  $k_{p4} < k_{d10}$ . Hence this tumor-free equilibrium point is locally stable if  $r_2 > b_{23}$  and  $k_{p4} < k_{d10}$ ; otherwise it is unstable.

The high tumor equilibrium  $\vec{X}_2$  exists when  $k_{p4} > k_{d10}$ . Twelve of the fifteen eigenvalues of the Jacobian matrix are found as

$$\{-k_{d1}, -k_{d3}, -k_{d4}, -k_{d4}, -b_{23} + r_2, -k_{d4} - c_{21} - c_{23}, -k_{d7}, -b_{31} - k_{d3}, -k_{d8}, -k_{d9}, -k_{d10} - k_{p4}, k_{d10} - k_{p4}\}.$$

The other three eigenvalues are the roots of the polynomial  $p(\lambda) = \lambda^3 + \alpha_1 \lambda^2 + \alpha_2 \lambda + \alpha_3$ , where

$$\begin{aligned} \alpha_1 &= a_{12} + a_{21} + a_{23} + k_{d5} + k_{d6} + \frac{a_{32}(k_{p4} - k_{d10})}{r_1 \varepsilon + k_{p4} - k_{d10}}, \\ \alpha_2 &= k_{d6}(k_{d5} + a_{12} + a_{21} + a_{23}) + a_{12}(k_{d5} + a_{23}) + (k_{d5} + a_{12} + a_{21}) \frac{a_{32}(k_{p4} - k_{d10})}{r_1 \varepsilon + k_{p4} - k_{d10}}, \\ \alpha_3 &= a_{12} k_{d5} k_{d6} + a_{12} a_{23} k_{d6} + k_{d5} a_{12} \frac{a_{32}(k_{p4} - k_{d10})}{r_1 \varepsilon + k_{p4} - k_{d10}}. \end{aligned}$$

Based on the list of the first twelve eigenvalues, the high-tumor equilibrium is unstable if either  $r_2 > b_{23}$  or  $k_{d10} > k_{p4}$  is satisfied. Suppose  $r_2 < b_{23}$  and  $k_{d10} < k_{p4}$ , it is easy to see that  $\alpha_i > 0$ ,  $i = 1, 2, 3$ . According to the Routh-Hurwitz criterion,  $p(\lambda)$  is a Hurwitz polynomial if and only if  $\alpha_1 \alpha_2 - \alpha_3 > 0$ , which is indeed the case after simplifying the expression. Therefore, the high-tumor equilibrium is stable if  $r_2 < b_{23}$  (i.e., APC<sub>2</sub> growth rate is smaller than the rate constant for APC<sub>2</sub> flowing from blood to tumor) and  $k_{d10} < k_{p4}$  (i.e., tumor proliferation rate is larger than tumor natural death rate), otherwise it is unstable.

The stability conditions for tumor free equilibrium  $\vec{X}_0$  indicate that small tumors may not grow into a threatening size when tumor proliferation rate is less than tumor natural death rate ( $k_{p4} < k_{d10}$ ) without any treatment ( $r_2 < b_{23}$  with all the APC<sub>*i*</sub>, OXP<sub>*i*</sub>, IL and T<sub>E*i*</sub>,  $i = 1, 2, 3$  in  $\vec{X}_0$  be to zero). Under the combined IL-12 and OXP treatment, MHC class I positive tumor cells will ultimately be eliminated. Depending on effects of the combined treatment (reflected by the remaining level of APC<sub>*i*</sub> and T<sub>E*i*</sub>,  $i = 1, 2, 3$  and whether  $r_2 > b_{23}$ ), MHC<sub>I</sub> negative tumor cells (C<sub>MHCI</sub><sup>-</sup>) will either be completely removed in which case solutions of this dynamic approach the second tumor-free equilibrium  $\vec{X}_1$  or the MHC class I negative tumor cells eventually approach the carrying capacity. This can occur when MHC class I

positive tumor cells are all killed by tumor infiltrating lymphocytes, which results in the exhaustion of effector CD8<sup>+</sup> T cells and cytokines while naïve T cells and MHC class I negative tumor cells remaining at constant levels.

### Sensitivity of parameters

To test the impact of how the change of a certain parameter value (e.g.  $\alpha$ ) would affect tumor growth pattern for responders, partial-responders, and non-responders, normalized differences of tumor sizes  $y_i = \frac{|\hat{y}_i - \bar{y}_i|}{\bar{y}_i}$ , ( $i = 1, 2, \dots, 30$ ) on day 120 (8 days post the second treatment cycle of the combination therapy after tumor rechallenge) were used to draw the violin plots ([48]) in Figure 4 for each of the 48 parameters for all three patient groups, where  $\hat{y}_i$  is the predicted tumor size in  $mm^3$  using  $0.1 \times \alpha_i$  and other parameters in the  $i$ th calibrated parameter set and  $\bar{y}_i$  is the predicted tumor size in  $mm^3$  using  $\alpha_i$  and other parameters in the  $i$ th calibrated parameter set and  $\alpha_i$  is the calibrated value for parameter  $\alpha$  in the  $i$ th calibrated parameter set.

In general, we found that changing the value of each of the 48 parameters barely affected the tumor growth for non-responders. In addition, there are 10 (out of 48) parameters whose value changes greatly affect tumor size of responders but not the size of non-responders and partial-responders. These potentially OXP and IL-12 treatment important parameters include  $c_{23}$  (OXP flow rate from blood to tumor),  $K$  (APC carrying capacity),  $c_4 - c_6$  (IFN $_{\gamma}$ , IL-12, and T $_R$  production rate constants, respectively),  $g_{10} - g_{14}$  (IL-12, IFN $_{\gamma}$ , OXP $_3$ , T $_R$ , and C $_{MHCI}^+$  killing by OXP $_3$  saturation rate constants, respectively). In addition, changes in the value of the following 7 parameters cause from zero for non-responders to increasing changes in normalized tumor size from partial-responders to responders: T cell flow rates from blood to lymph node and from tumor to blood,  $a_{21}$  and  $a_{32}$ , respectively; APC flow rates from tumor to lymph node  $b_{31}$ ; production rate constant of naïve T cells  $c_1$ ; transfer rate constant of naïve T cell to T effector cell in lymph node  $c_2$ ; IL-12 natural death rate constant  $k_{d8}$ , and APC growth rate constant  $r_2$ . We also note that no change in tumor size for all three mice group (non-responders, partial-responders, and responders) results from the value changes of following 5 parameters: C $_{MHCI}^-$  killing by OXP $_3$  saturation rate constant  $g_{15}$ , natural death rate constant of naïve T cells  $k_{d1}$ , killing rate constant of T effectors or tumor cells by OXP  $k_{d2}$ , APCs natural death rate constant  $k_{d3}$ , and natural decay rate constant of OXP  $k_{d4}$  (see Fig. 4).

### Model simulations

In order to investigate potential ways to improve treatment regimes for partial-responders and non-responders, we simulated the following alternative treatment scenarios: changing the dose and frequency of chemotherapy drug OXP administration, changing the strength of Mif-induced IL-12 expression, and changing the number of combined treatment cycles.

#### Partial-responders

We note from Figure 5 that increased number of treatment cycles in the IL-12 and OXP combination therapy does not seem to improve tumor control in the first

8 months post treatment while increased dose of OXP alone would achieve better tumor control and enhanced strength of IL-12 expression alone would slightly reduce tumor size more rapidly after the tumor reaches its maximum size.

### Non-responders

From Figure 6, we found that neither increased strength of IL-12 expression nor moderately increased OXP dose alone in the IL-12 and oxaliplatin (OXP) combination therapy seems to improve tumor control for the median, 90th percentile lower and 90th percentile upper responses for the 30 non-responder patients. Meanwhile, aggressively increased OXP dose (for instance, 10+ times) in the combination therapy shows reduced tumor size and delayed time of tumor reaching its carrying capacity only for the 90th percentile lower responses for the 30 patients. The reduction of tumor size slows greatly when OXP dose is increased to more than 100 times. In addition, increased number of treatment cycles in the IL-12 and OXP combination therapy reduced tumor size and delayed the time of tumor reaching its carrying capacity only for the 90th percentile lower responses for the 30 patients.

## Discussion and Conclusion

Developing mathematical models that represent known features of the biological system and that are calibrated to experimental studies can help improve understanding of the underlying biology targeted by drugs and enables exploring therapeutic scenarios that may be difficult or costly to test experimentally. In this paper, we developed a three-compartment mechanistic mathematical model to describe the clonal expansion of CD8+ T cells in a mouse model of metastatic colorectal cancer in response to a combined therapy of IL-12 plus the chemotherapy drug Oxaliplatin. Based on the collective knowledge of the underlying biology, the model represents the primary CD8+ T cell response under a boosting effect of IL-12 and OXP and the subsequent impact on the growth of a tumor based on the syngeneic MC38Luc1 mouse model for metastatic colorectal cancer, where the observed response was characterized by three phenotypes: responders, partial responders, and non-responders. Model parameters were calibrated against published experimental data that describes the primary response for these three phenotypes. The sensitivity analysis of parameters helped explain the differences in calibrated values of parameters between non-responders, partial-responders, and responders. To reduce the dependence of our model predictions on any single calibrated set of parameter values, we generated an ensemble of 30 parameter sets for each phenotype that provided a similar good fit against the experimental data and show the distribution in phenotypic responses for those virtual cohorts. Using the corresponding ensemble of model predictions for non-responders, numerical simulation of multiple OXP and IL-12 combination therapy suggest that aggressively increasing the dose (between 10 and 100 times of the control) of OXP will improve tumor control results while increasing the number of treatment cycles of the combined therapy can decrease the tumor size as well. We also found that only increasing the OXP dose in the combination therapy can dramatically decrease the tumor size for partial responders. Overall, these results illustrate how mechanistic models can be used to predict tumor growth response to antigen-specific immuno-chemotherapies and

screen in silico for optimal therapeutic dosage and timing in treating patients with metastatic colorectal cancer.

#### Ethics

The authors declare that no experiments have been performed as part of the research for this manuscript.

#### Competing interests

The authors declare that they have no competing interests.

#### Author's contributions

DJK and QW conceived the study. DJK and QW developed the model and drafted the manuscript, ZW wrote the computer simulation code and designed the online simulators, YW performed stability analysis, QW did the numerical simulations and analyzed simulation data. All authors approved the final version of the manuscript.

#### Acknowledgements

This work was supported by grants from the National Science Foundation (CAREER 1053490 to DJK), the National Cancer Institute (R01CA193473 to DJK), and the National Institute of General Medical Sciences of the National Institutes of Health grant as part of the West Virginia IDeA Network of Biomedical Research Excellence (P20GM103434 to QW). The content is solely the responsibility of the authors and does not necessarily represent the official views of the NSF, the NCI, or the National Institutes of Health. The authors would like to thank Peter Hopkins for the calibration of parameter values of functions describing relationships between IL-12 concentrations and Mif or time in days to experimental data. The authors would also like to thank Brian Crutchley, Brendan Jarrell and Vasile Stadnitchii for sensitivity analysis.

#### Author details

<sup>1</sup>Department of Computer Sciences, Mathematics, and Engineering, Shepherd University, 25443, Shepherdstown, WV, USA. <sup>2</sup>Department of Mathematical Sciences, Georgia Southern University, 30458, Statesboro, GA, USA. <sup>3</sup>Department of Chemical and Biomedical Engineering and WVU Cancer Institute, West Virginia University, 25606, Morgantown, WV, USA. <sup>4</sup>Department of Microbiology, Immunology, & Cell Biology, West Virginia University, 25606, Morgantown, WV, USA.

#### References

1. Cancer.org: Colon and Rectum Cancer. <http://www.cancer.org/cancer/colonandrectumcancer/detailedguide/>
2. Martinet, O., Ermekova, V., Qiao, J.Q., Sauter, B., Mandeli, J., Chen, L., Chen, S.H.: Immunomodulatory gene therapy with interleukin 12 and 4-1bb ligand: long-term remission of liver metastases in a mouse model. *J. Natl. Cancer Inst.* **92**(11), 931–936 (2000)
3. Hernandez-Alcoceba, R., Berraondo, P.: Immunochemotherapy against colon cancer by gene transfer of interleukin-12 in combination with oxaliplatin. *Oncoimmunology* **1**(1), 97–99 (2012)
4. Colombo, M.P., Trinchieri, G.: Interleukin 12 in antitumor immunity and immunotherapy. *Cytokine Growth Factor Rev.* **13**(2), 155–168 (2002)
5. Klinke, D.J.: A multiscale systems perspective on cancer, immunotherapy, and interleukin 12. *Molecular Cancer* **9**(242), 18 (2010)
6. Gonzalez-Aparicio, M., Alzuguren, P., Mauleon, I., Medina-Echeverz, J., Hervas-Stubbs, S., Mancheno, U., Berraondo, P., Crettaz, J., Gonzalez-Aseguinolaza, G., Prieto, J., Hernandez-Alcoceba, R.: Oxaliplatin in combination with liver specific expression of interleukin 12 reduces the immunosuppressive microenvironment of tumours and eradicates metastatic colorectal cancer in mice. *Gut*. **60**(3), 341–349 (2011)
7. Vacchelli, E., Prada, N., Kepp, O., Galluzzi, L.: Current trends of anticancer immunochemotherapy. *Oncoimmunology* **2**(6), 3 (2013)
8. Kosinsky, Y., Dovedi, S.J., Peskov, V. K nd Voronova, Chu, L., Tomkinson, H., Al-Huniti, N., Stanski, D.R., G, H.: Radiation and pd-(l)1 treatment combinations: immune response and dose optimization via a predictive systems model. *J. Immunother. Cancer* **6**(1), 17 (2018)
9. Wodarz, D., Komarova, N.L.: *Computational Biology of Cancer: Lecture Notes and Mathematical Modeling*. World Scientific, New Jersey (2005)
10. Klinke, D.J., Wang, Q.: Understanding immunology via engineering design: the role of mathematical prototyping. *Comput. Math. Methods Med.* **9**, 9 (2012)
11. Klinke, D.J.: In silico model-based inference: A contemporary approach for hypothesis testing in network biology. *Biotechnol. Prog.*, 1247–61 (2014)
12. Kim, P.S., Crivelli, J.J., Choi, I.K., Yun, C.O., Wares, J.R.: Quantitative impact of immunomodulation versus oncolysis with cytokine expressing virus therapeutics. *Math. Biosci. Eng.* **12**(4), 841–858 (2015)
13. Wang, Q., Klinke, D.J., Wang, Z.: Cd8 t cell response to adenovirus vaccination and subsequent suppression of tumor growth: modeling, simulation and analysis. *BMC Syst. Biol.* **9**(27), 19 (2015)
14. Eftimie, R., Dushoff, J., Bridle, B.W., Bramson, J.L., Earn, D.J.: Multistability and multiinstability phenomena in a mathematical model of tumor immune virus interactions. *Bull. Math. Biol.* **73**(12), 2932–2961 (2011)
15. Gadkar, K.G., Shoda, L.K., Kreuwel, H.T., Ramanujan, S., Zheng, Y., Whiting, C.C., Young, D.L.: Dosing and timing effects of antidiabetic therapy: predictions from a mathematical model of type 1 diabetes. *Annals of the New York Academy of Sciences* **1103**, 63–68 (2007)
16. Zheng, Y., Bresson, D., Fradkin, M., Chan, J.R., von Herrath, M., C, W.: Biosimulations predict optimal oral insulin\ anti-cd3 and oral insulin/exendin-4 combination treatment regimens for the reversal of diabetes in the non-obese diabetic (nod) mouse. *Clinical Immunology* **127**, 101–102 (2008)
17. Pappalardo, F., Martinez Forero, I., Pennisi, M., Palazon, A., Melero, I., Motta, S.: Simb16: modeling induced immune system response against b16-melanoma. *PLoS One* **6**(10), 12 (2011)

18. Dovedi, S.J., Adlard, A.L., Lipowska-Bhalla, G., McKenna, C., et al.: Acquired resistance to fractionated radiotherapy can be overcome by concurrent pd-1 blockade. *Cancer Res.* **74**(19), 5458–5468 (2014)
19. Dovedi, S.J., Cheadle, E.J., Popple, A., Poon, E., Morrow, M., Stewart, R., et al.: Fractionated radiation therapy stimulates anti-tumor immunity mediated by both resident and infiltrating polyclonal t-cell populations when combined with pd1 blockade. *Clin. Cancer Res.* **23**(18), 5514–5526 (2017)
20. Kirschner, D., Panetta, J.C.: Modeling immunotherapy of the tumor immune interaction. *J. Math. Biol.* **37**(3), 235–252 (1998)
21. Kim, P.S., Lee, P.P.: Modeling protective antitumor immunity via preventative cancer vaccines using a hybrid agent based and delay differential equation approach. *PLoS Comput Biol.* **8**(10), 16 (2012)
22. Eftimie, R., Bramson, J.L., Earn, D.J.: Interactions between the immune system and cancer: a brief review of nonspatial mathematical models. *Bull. Math. Biol.* **73**(1), 2–32 (2011)
23. Pappalardo, F., Palladini, A., Pennisi, M., F, C., Motta, S.: Mathematical and computational models in tumor immunology. *Math. Model. Nat. Phenom.* **7**(1), 25 (2012)
24. Tsygvintsev, A., Marino, S., Kirschner, D.E.: *Mathematical Methods and Models in Biomedicine Lecture Notes on Mathematical Modelling in the Life Sciences.* Springer, New York (2013)
25. Eladdadi, A., P, K., Mallet, D.: *Mathematical Models of Tumor Immune System Dynamics.* Springer, Switzerland (2014)
26. de Pillis, L.G., Gu, W., Radunskaya, A.E.: Mixed immunotherapy and chemotherapy of tumors: modeling, applications and biological interpretations. *J. Theor. Biol.* **238**(4), 841–862 (2006)
27. de Pillis, L.G., Fister, K.R., Gu, W., Collins, C., M, D., D, G., Moore, J., Preskill, B.: Seeking bangbang solutions of mixed immunochemotherapy of tumor. *Electronic Journal Differential Equations* **2007**(171), 1–24 (2007)
28. de Pillis, L.G., Eladdadi, A., Radunskaya, A.E.: Modeling cancer immune responses to therapy. *Journal of pharmacokinetics and pharmacodynamics* **41**(5), 461–478 (2014)
29. J, M.K., R, O., Eladdadi, A., de Pillis, L.G.: Mathematical model of tumor immune surveillance. *Journal of Theoretical Biology* **404**(171), 312–330 (2016)
30. Wang, Z., Wang, Q.: Numerical simulation of a tumor growth dynamics model using particle swarm optimization. *J. Comput. Sci. Syst. Biol.* **9**(1), 1–5 (2015)
31. Jenkins, M.K., Chu, H.H., McLachlan, J.B., Moon, J.J.: On the composition of the preimmune repertoire of t cells specific for peptide-major histocompatibility complex ligands. *Annu. Rev. Immunol.* **28**, 275–294 (2010)
32. Miller, M.J., Wei, S.H., Parker, I., Cahalan, M.D.: Two-photon imaging of lymphocyte motility and antigen response in intact lymph node. *Science* **296**(5574), 1869–1873 (2002)
33. Krummel, M., Bartumeus, F., A, G.: T-cell migration, search strategies and mechanisms. *Nat. Rev. Immunol.* **16**(3), 193–201 (2016)
34. Tang, M., Diao, J., Catral, M.S.: Molecular mechanisms involved in dendritic cell dysfunction in cancer. *Cellular and Molecular Life Sciences* **74**(5), 761–776 (2017)
35. C57BL\ 6 Inbred Mouse. <https://www.horizondiscovery.com/in-vivo-models/sagespeed-custom-model-generation>
36. Linderman, J.J., Riggs, T., Pande, M., Miller, M., Marino, S., Kirschner, D.E.: Characterizing the dynamics of cd4+ t cell priming within a lymph node. *J. Immunol.* **184**(6), 2873–2885 (2010)
37. Pufnock, J.S., Cigal, M., Rolczynski, L.S., Andersen-Nissen, E., Wolfl, M., McElrath, M.J., Greenberg, P.D.: Priming cd8+ t cells with dendritic cells matured using tlr4 and tlr7/8 ligands together enhances generation of cd8+ t cells retaining cd28. *Blood* **117**(24), 6542–6551 (2011)
38. Abbas, A.K., Lichtman, A.H.: *Cellular and Molecular Immunology*, 5th edn. Saunders, Philadelphia (2003)
39. Nowak, A.K., Lake, R.A., Marzo, A.L., Scott, B., Heath, W.R., Collins, E.J., Frelinger, J.A., Robinson, B.W.: Induction of tumor cell apoptosis in vivo increases tumor antigen cross-presentation, cross-priming rather than cross-tolerizing host tumor-specific cd8 t cells. *J. Immunol.* **170**(10), 4905–4913 (2003)
40. Wei, L.Z., Xu, Y., Nelles, E.M., Furlonger, C., Wang, J.C., Di Grappa, M.A., Khokha, R., Medin, J.A., Paige, C.J.: Localized interleukin 12 delivery for immunotherapy of solid tumours. *J. Cell Mol. Med.* **17**(11), 1465–1474 (2013)
41. Cao, X., Leonard, K., Collins, L.I., Cai, S.F., Mayer, J.C., Payton, J.E., Walter, M.J., Pivnicka-Worms, D., Schreiber, R.D., Ley, T.J.: Interleukin 12 stimulates ifn gamma mediated inhibition of tumor induced regulatory t cell proliferation and enhances tumor clearance. *Cancer Res.* **69**(22), 8700–8709 (2009)
42. McGray, A.J., Hallett, R., Bernard, D., Swift, S.L., Zhu, Z., Teoderascu, F., Vanseggelen, H., Hassell, J.A., Hurwitz, A.A., Wan, Y., Bramson, J.L.: Immunotherapy-induced CD8+ T cells instigate immune suppression in the tumor. *Mol. Ther.* **22**(1), 206–218 (2014)
43. Wang, L., Hernández-Alcoceba, R., Shankar, V., Zabala, M., Kochanek, S., Sangro, B., Kramer, M.G., Prieto, J., C, Q.: Prolonged and inducible transgene expression in the liver using gutless adenovirus: a potential therapy for liver cancer. *Gastroenterology* **126**(1), 278–289 (2004)
44. Zabala, M., Alzuguren, P., Benavides, C., Crettaz, J., Gonzalez-Aseguiñolaza, G., Ortiz de Solorzano, C., Gonzalez-Aparicio, M., Kramer, M.G., Prieto, J., Hernandez-Alcoceba, R.: Evaluation of bioluminescent imaging for noninvasive monitoring of colorectal cancer progression in the liver and its response to immunogene therapy. *Mol. Cancer* **8**(2), 13 (2009)
45. Choy, G., O'Connor, S., Diehn, F.E., Costouros, N., Alexander, H.R., Choyke, P., Libutti, S.K.: Comparison of noninvasive fluorescent and bioluminescent small animal optical imaging. *Biotechniques* **35**(5), 1022–1026 (2003)
46. Duriancik, D.M., Hoag, K.A.: The identification and enumeration of dendritic cell populations from individual mouse spleen and peyer patches using flow cytometric analysis. *Cytometry A* **75**(11), 951–959 (2009)
47. Twyman-Saint Victor, C., Rech, A.J., Maity, A., Rengan, R., Pauken, K.E., Stelekati, E., Benci, J.L., et al.: Radiation and dual checkpoint blockade activate non-redundant immune mechanisms in cancer. *Nature* **520**(67547), 373–377 (2015)
48. Violin Plot. [https://en.wikipedia.org/wiki/Violin\\_plot](https://en.wikipedia.org/wiki/Violin_plot)



Figures

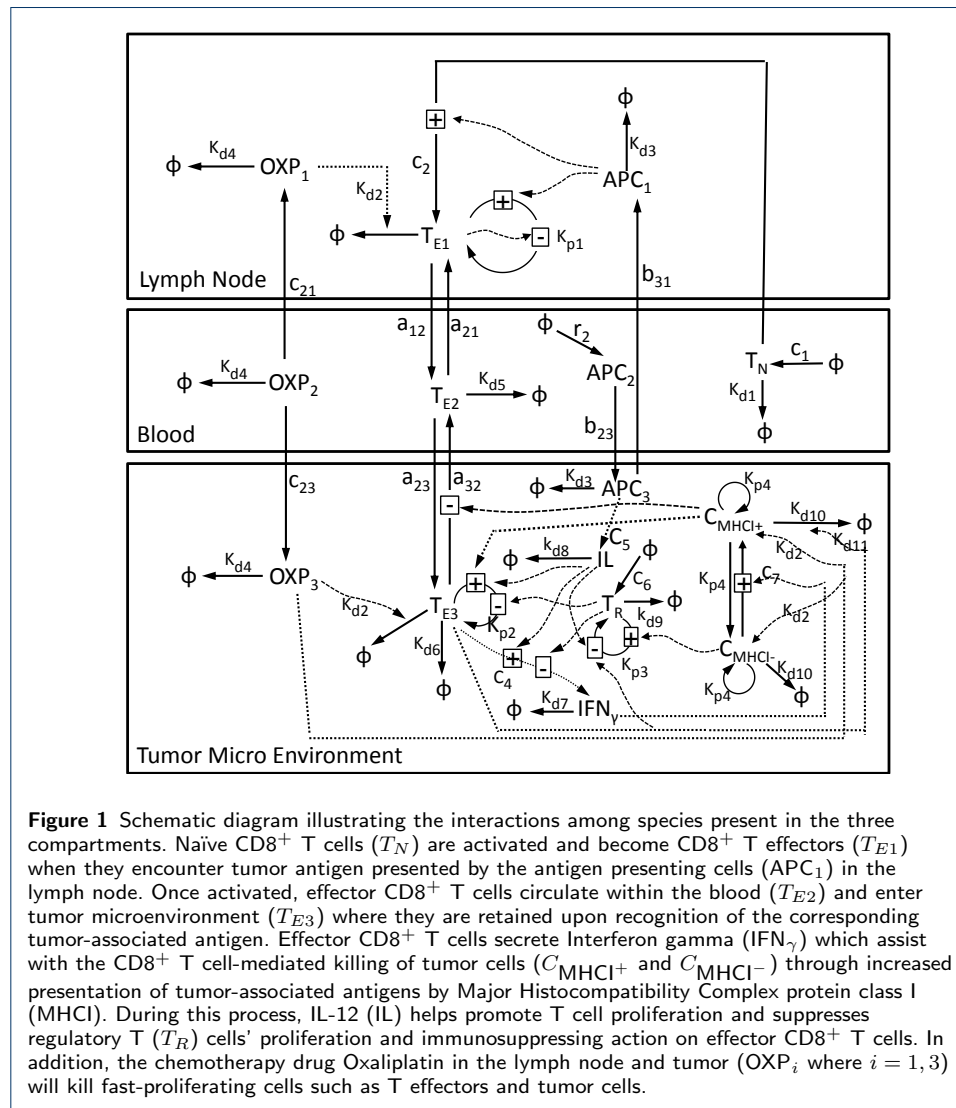

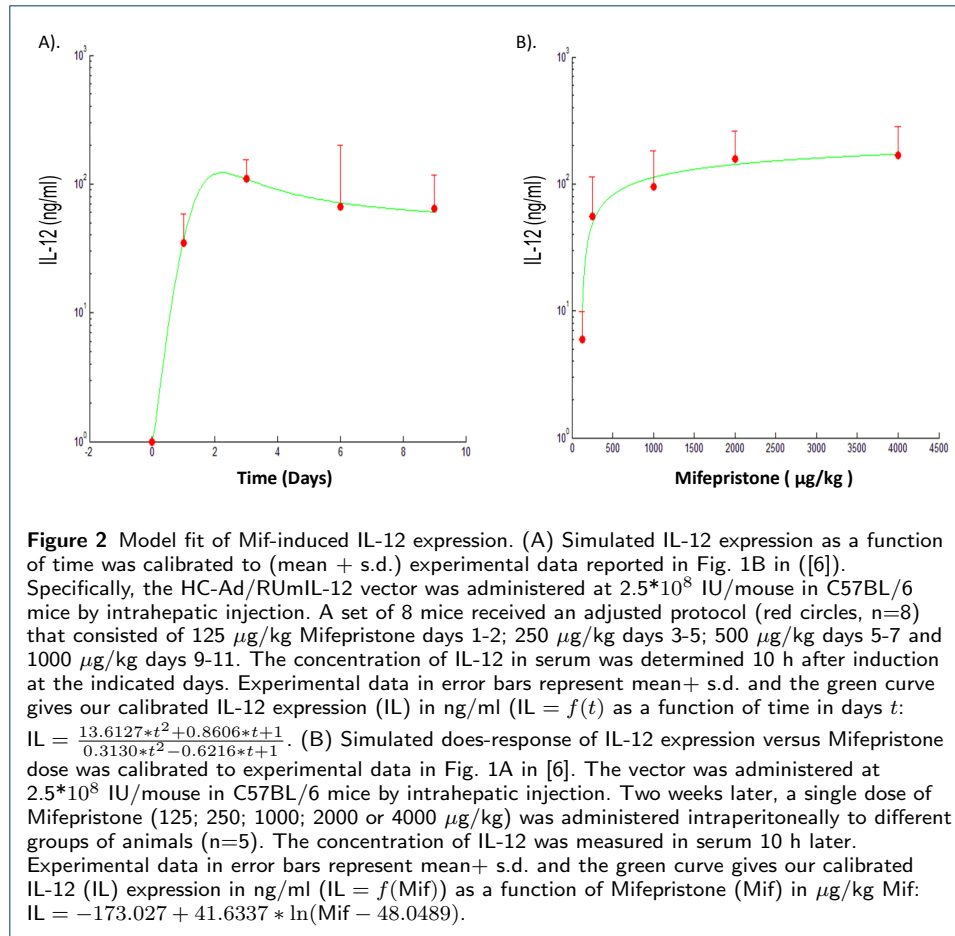

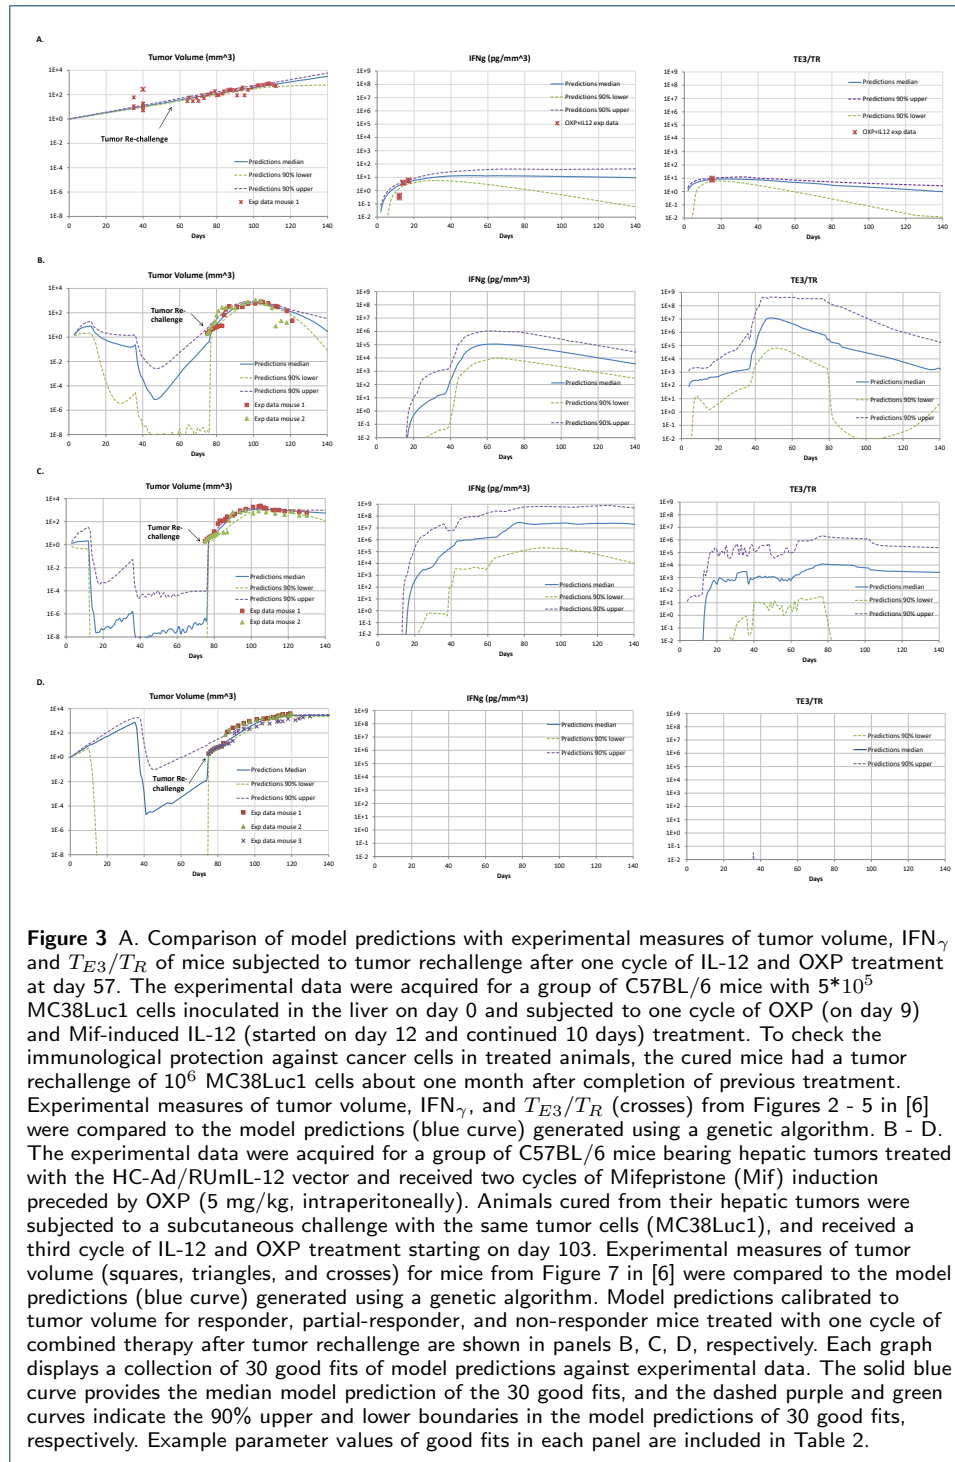

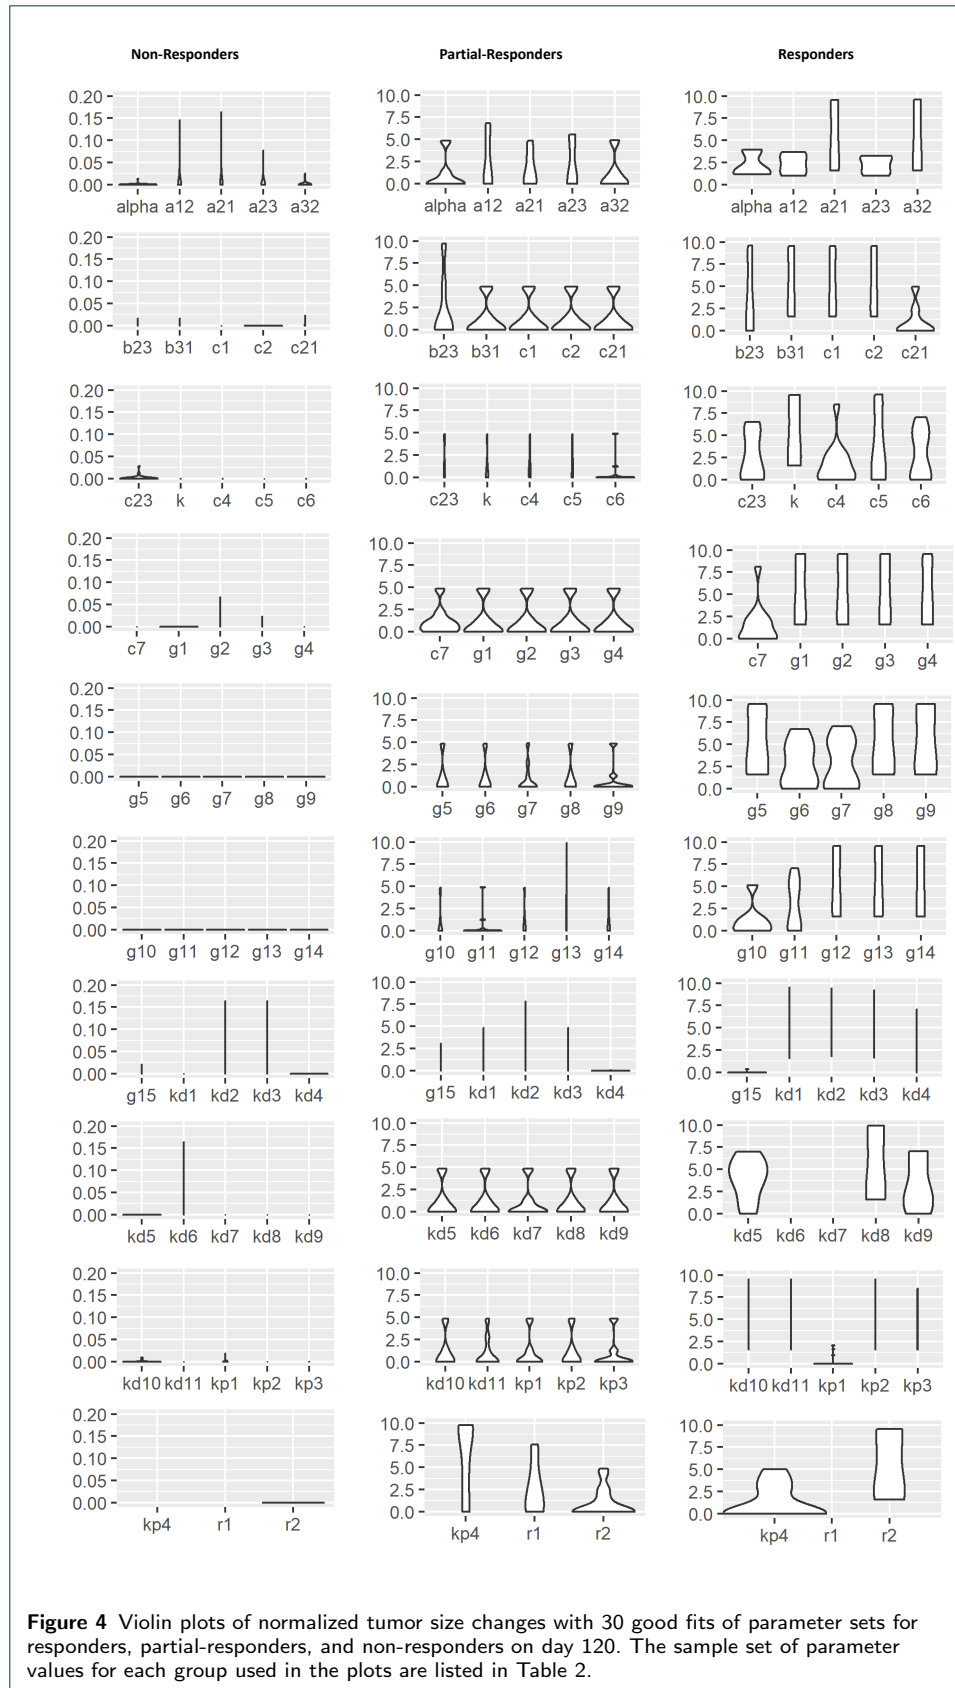

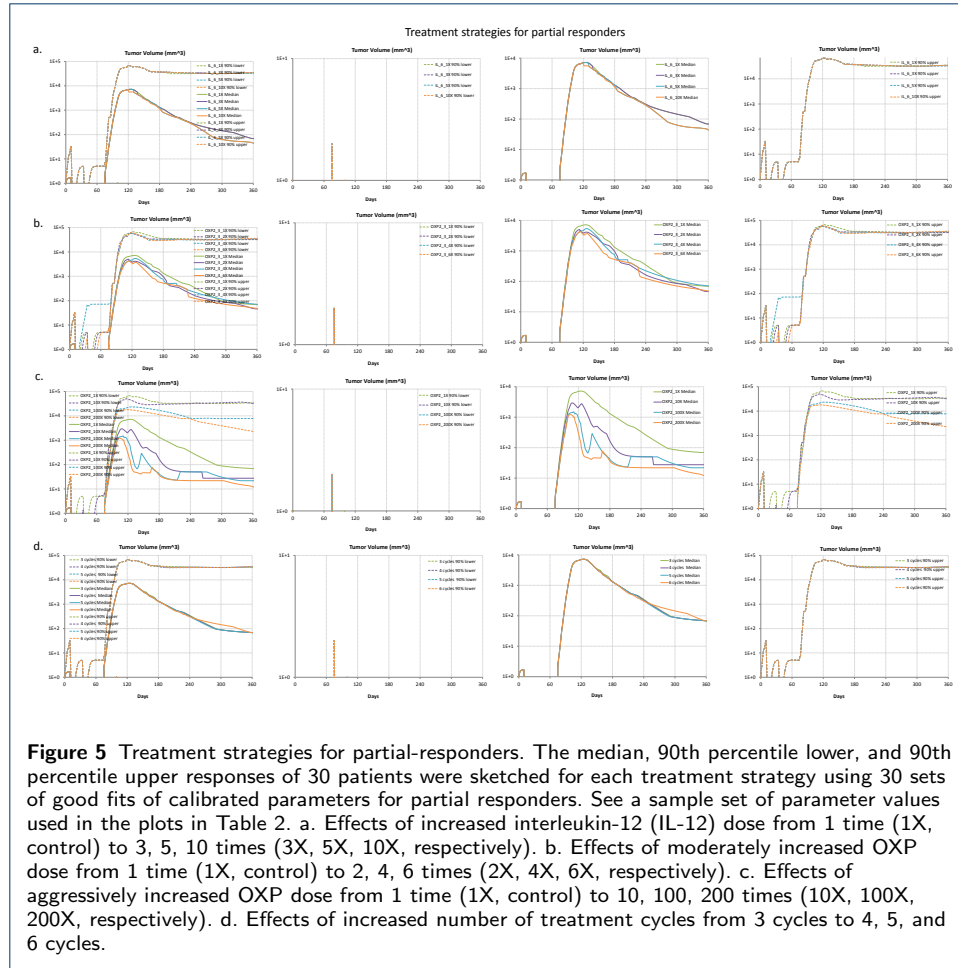

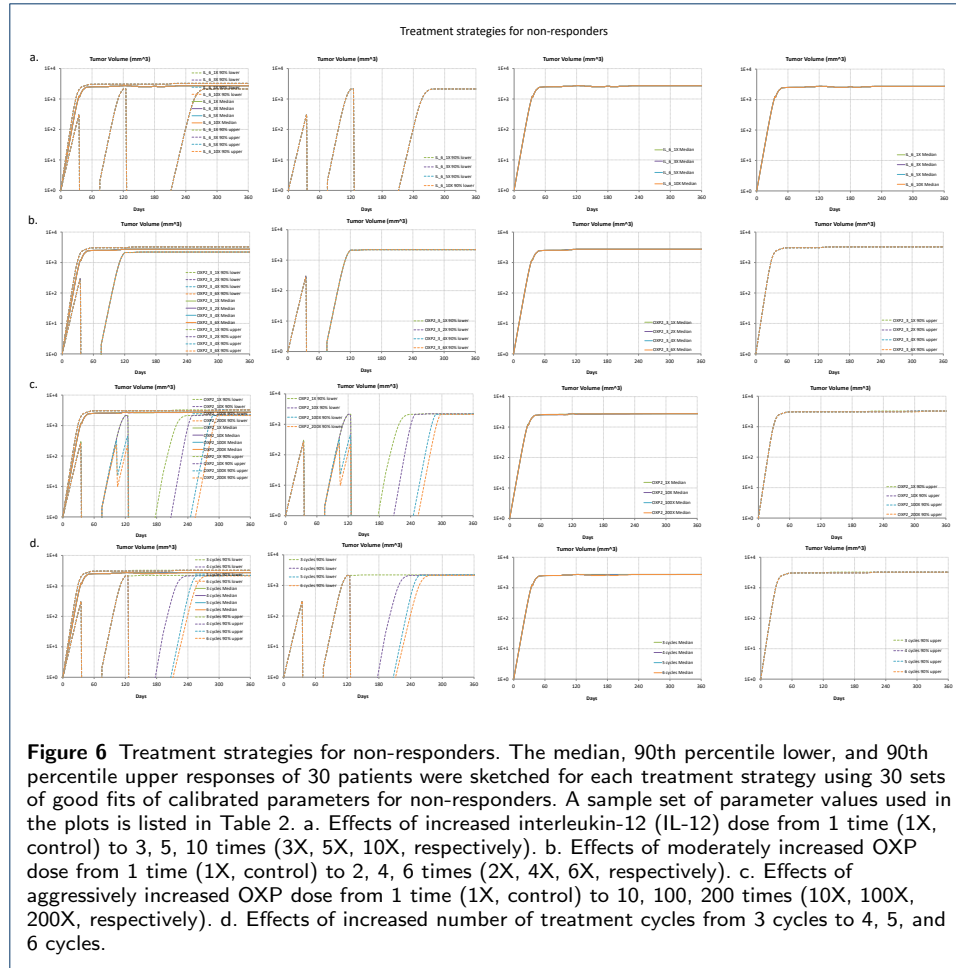

Tables

**Table 1** List of parameters in the model

| Parameter | Units                                | Description                                                                                                 |
|-----------|--------------------------------------|-------------------------------------------------------------------------------------------------------------|
| $k_{d1}$  | $day^{-1}$                           | Naïve CD8 <sup>+</sup> T cell natural death rate constant                                                   |
| $k_{d2}$  | $day^{-1}$                           | T effector (in lymph node or tumor) or tumor cell death rate constant due to OXP                            |
| $k_{d3}$  | $day^{-1}$                           | APC (in lymph node or tumor) natural death rate constant                                                    |
| $k_{d4}$  | $day^{-1}$                           | OXP natural decay rate constant                                                                             |
| $k_{d5}$  | $day^{-1}$                           | T effector (in blood) natural death rate constant                                                           |
| $k_{d6}$  | $day^{-1}$                           | T effector (in tumor) natural death rate constant                                                           |
| $k_{d7}$  | $day^{-1}$                           | Interferon $\gamma$ natural death rate constant                                                             |
| $k_{d8}$  | $day^{-1}$                           | IL-12 natural death rate constant                                                                           |
| $k_{d9}$  | $day^{-1}$                           | Regulatory T cell natural death rate constant                                                               |
| $k_{d10}$ | $day^{-1}$                           | Tumor cell natural death rate constant                                                                      |
| $k_{d11}$ | $mm^3 * day^{-1}$                    | MHC class I positive tumor cell death rate constant due to T effector (in tumor) lysis                      |
| $k_{p1}$  | $day^{-1}$                           | T effector (in lymph node) proliferation rate constant due to tumor antigens presented by APC in lymph node |
| $k_{p2}$  | $day^{-1}$                           | T effector (in tumor) proliferation rate constant                                                           |
| $k_{p3}$  | $ng * mm^{-3} * day^{-1}$            | Regulatory T cell proliferation rate constant due to tumor growth and proliferation of T effector in tumor  |
| $k_{p4}$  | $day^{-1}$                           | Tumor cell proliferation rate constant                                                                      |
| $a_{12}$  | $day^{-1}$                           | Rate constant for T cell flow from lymph node to blood                                                      |
| $a_{21}$  | $day^{-1}$                           | Rate constant for T cell flow from blood to lymph node                                                      |
| $a_{23}$  | $day^{-1}$                           | Rate constant for T cell flow from blood to tumor                                                           |
| $a_{32}$  | $day^{-1}$                           | Rate constant for T cell flow from tumor to blood                                                           |
| $b_{23}$  | $day^{-1}$                           | Rate constant for APC flow from blood to tumor                                                              |
| $b_{31}$  | $day^{-1}$                           | Rate constant for APC flow from tumor to lymph node                                                         |
| $c_1$     | $cell \cdot mm^{-3} \cdot day^{-1}$  | Naïve T cell natural production rate constant                                                               |
| $c_2$     | $day^{-1}$                           | Naïve T cell to T effector (in lymph node) transfer rate constant                                           |
| $c_{21}$  | $day^{-1}$                           | Rate constant for OXP flow from blood to lymph node                                                         |
| $c_{23}$  | $day^{-1}$                           | Rate constant for OXP flow from blood to tumor                                                              |
| $c_4$     | $pg \cdot mm^{-3} \cdot day^{-1}$    | Interferon $\gamma$ secretion constant                                                                      |
| $c_5$     | $pg \cdot cell^{-1} \cdot day^{-1}$  | IL-12 production rate constant by APC in tumor                                                              |
| $c_6$     | $cells \cdot mm^{-3} \cdot day^{-1}$ | Regulatory T cell production rate constant                                                                  |
| $c_7$     | $day^{-1}$                           | MHC class I negative to positive tumor cells transfer rate constant                                         |
| $\alpha$  | $(cell \cdot mm^{-3})^2$             | T effector (in lymph node) saturation constant                                                              |
| $K$       | $cell \cdot mm^{-3}$                 | Carrying capacity of APC (in blood)                                                                         |
| $g_1$     | $cell \cdot mm^{-3}$                 | APC (in lymph node) saturation constant                                                                     |
| $g_2$     | $cell \cdot mm^{-3}$                 | APC (in lymph node) saturation constant                                                                     |
| $g_3$     | $mg \cdot kg^{-1}$                   | OXP (in lymph node) saturation constant                                                                     |
| $g_4$     | $ng * ml$                            | IL-12 saturation rate constant                                                                              |
| $g_5$     | $cell \cdot mm^{-3}$                 | Regulatory T cell saturation constant                                                                       |
| $g_6$     | $mg \cdot kg^{-1}$                   | OXP (in tumor) saturation constant                                                                          |
| $g_7$     | $ng \cdot ml$                        | IL-12 saturation rate constant                                                                              |
| $g_8$     | $cell \cdot mm^{-3}$                 | Regulatory T cell saturation rate constant                                                                  |
| $g_9$     | $cell \cdot mm^{-3}$                 | T effector (in tumor) saturation rate constant                                                              |
| $g_{10}$  | $ng \cdot ml$                        | IL-12 saturation constant                                                                                   |
| $g_{11}$  | $pg \cdot mm^{-3}$                   | Cellular Interferon $\gamma$ saturation constant                                                            |
| $g_{12}$  | $mg \cdot kg^{-1}$                   | OXP (in tumor) saturation rate constant                                                                     |
| $g_{13}$  | $cell \cdot mm^{-3}$                 | Regulatory T cell saturation rate constant                                                                  |
| $g_{14}$  | $mg \cdot kg^{-1}$                   | OXP (in tumor) killing MHC class I positive tumor cells saturation rate constant                            |
| $g_{15}$  | $mg \cdot kg^{-1}$                   | OXP (in tumor) killing MHC class I negative tumor cells saturation rate constant                            |
| $r_1$     | $cell^{-1} \cdot day^{-1}$           | Constant in tumor logistic growth                                                                           |
| $r_2$     | $day^{-1}$                           | Growth rate constant of APC (in blood)                                                                      |

**Table 2** Examples of calibrated parameter values against experimental data

| Parameter | Fig.3A.            | Fig.3B. Par.-Res.  | Fig.3C. Res.       | Fig.3D. Non-Res.   |
|-----------|--------------------|--------------------|--------------------|--------------------|
| $k_{d1}$  | $8.060 * 10^{-2}$  | $4.613 * 10^{-5}$  | $7.892 * 10^{-6}$  | $7.629 * 10^{-5}$  |
| $k_{d2}$  | $3.954 * 10^{-2}$  | 9.923              | 3.286              | 8.370              |
| $k_{d3}$  | $5.738 * 10^{-1}$  | 3.863              | 5.982              | $5.727 * 10^{-1}$  |
| $k_{d4}$  | 1.760              | 2.658              | $1.924 * 10^{-3}$  | 2.358              |
| $k_{d5}$  | $6.293 * 10^{-3}$  | $3.312 * 10^{-4}$  | $5.385 * 10^{-1}$  | $6.170 * 10^{-5}$  |
| $k_{d6}$  | $9.849 * 10^{-3}$  | $5.026 * 10^{-6}$  | $2.258 * 10^{-2}$  | $5.988 * 10$       |
| $k_{d7}$  | $8.159 * 10^{-2}$  | $3.390 * 10^{-2}$  | $7.620 * 10^{-2}$  | 5.603              |
| $k_{d8}$  | $6.097 * 10^{-1}$  | $5.085 * 10^{-6}$  | $4.692 * 10^{-4}$  | $2.513 * 10^{-7}$  |
| $k_{d9}$  | $4.382 * 10^{-6}$  | $5.310 * 10^{-6}$  | $2.206 * 10^{-2}$  | $9.706 * 10^{-7}$  |
| $k_{d10}$ | $2.116 * 10^{-5}$  | $2.140 * 10^{-6}$  | $7.795 * 10^{-6}$  | $9.434 * 10^{-6}$  |
| $k_{d11}$ | $7.956 * 10^{-3}$  | $6.953 * 10^{-6}$  | $7.047 * 10^{-5}$  | $6.539 * 10^{-5}$  |
| $k_{p1}$  | 2.188 * 10         | $4.770 * 10^4$     | 9.808 * 10         | $5.515 * 10^2$     |
| $k_{p2}$  | $6.445 * 10^{-6}$  | $8.367 * 10^{-7}$  | $1.687 * 10^{-12}$ | $9.255 * 10^{-7}$  |
| $k_{p3}$  | $5.015 * 10^{-7}$  | $7.807 * 10^{-9}$  | $4.276 * 10^{-7}$  | $8.696 * 10^{-7}$  |
| $k_{p4}$  | $5.800 * 10^{-2}$  | $3.952 * 10^{-1}$  | $3.297 * 10^{-1}$  | $2.186 * 10^{-1}$  |
| $a_{12}$  | $5.497 * 10^{-1}$  | 9.636              | $3.031 * 10^{-2}$  | $8.575 * 10^{-2}$  |
| $a_{21}$  | $1.133 * 10^{-4}$  | $9.984 * 10^{-1}$  | $9.011 * 10^{-4}$  | $1.614 * 10^{-1}$  |
| $a_{23}$  | $7.254 * 10^{-7}$  | $9.567 * 10^{-6}$  | $2.431 * 10^{-3}$  | $4.776 * 10^{-11}$ |
| $a_{32}$  | $4.575 * 10^{-3}$  | $9.246 * 10^{-1}$  | $2.573 * 10^{-3}$  | $7.638 * 10^{-3}$  |
| $b_{23}$  | $9.581 * 10^5$     | $6.334 * 10^{-9}$  | $1.406 * 10^{-2}$  | $5.710 * 10^{-13}$ |
| $b_{31}$  | $6.872 * 10^{-7}$  | $8.489 * 10^{-8}$  | $5.700 * 10^{-10}$ | $3.980 * 10^{-9}$  |
| $c_1$     | $8.563 * 10^{-4}$  | 9.611              | $4.366 * 10^{-4}$  | $4.108 * 10^{-2}$  |
| $c_2$     | $7.360 * 10^{-2}$  | $8.751 * 10^{-2}$  | $3.373 * 10$       | $6.011 * 10^{-2}$  |
| $c_{21}$  | $7.211 * 10^{-8}$  | $5.684 * 10^{-4}$  | $5.475 * 10^{-2}$  | $9.907 * 10^{-1}$  |
| $c_{23}$  | $3.648 * 10^{-6}$  | 5.873              | 3.355              | $9.905 * 10^{-1}$  |
| $c_4$     | $6.878 * 10^{-2}$  | $8.671 * 10^4$     | $7.547 * 10^2$     | $2.327 * 10^2$     |
| $c_5$     | $5.263 * 10^5$     | $9.844 * 10^{-9}$  | $7.279 * 10^{-10}$ | $9.722 * 10^{-11}$ |
| $c_6$     | $1.490 * 10^{-2}$  | $3.260 * 10^{-2}$  | $6.253 * 10^{-4}$  | $7.635 * 10^2$     |
| $c_7$     | $8.842 * 10^2$     | 7.546              | $3.412 * 10^2$     | $9.289 * 10^3$     |
| $\alpha$  | $5.530 * 10^9$     | $3.647 * 10^6$     | $1.556 * 10^7$     | $9.834 * 10^3$     |
| $K$       | $7.539 * 10^4$     | $9.292 * 10^{12}$  | $3.116 * 10^{11}$  | $4.964 * 10^5$     |
| $g_1$     | $7.971 * 10^9$     | 4.578              | $9.304 * 10^2$     | $3.445 * 10^4$     |
| $g_2$     | $2.441 * 10^{-2}$  | $3.568 * 10^{-10}$ | $6.108 * 10^{-13}$ | $5.108 * 10^{-12}$ |
| $g_3$     | $3.561 * 10^{-7}$  | $1.081 * 10^{-11}$ | $9.294 * 10^{-12}$ | $5.325 * 10^{-5}$  |
| $g_4$     | $6.740 * 10^2$     | $9.535 * 10^4$     | $1.518 * 10$       | $3.713 * 10$       |
| $g_5$     | $9.702 * 10^7$     | $2.440 * 10^5$     | $9.131 * 10^{-3}$  | $8.235 * 10^{11}$  |
| $g_6$     | $2.318 * 10^5$     | $8.034 * 10^3$     | $3.843 * 10^6$     | $6.932 * 10^4$     |
| $g_7$     | $9.387 * 10^7$     | $9.307 * 10^8$     | $9.040 * 10^8$     | $7.528 * 10^8$     |
| $g_8$     | $8.412 * 10^{-5}$  | $7.079 * 10^{-9}$  | $7.897 * 10^{-7}$  | $5.385 * 10^{-8}$  |
| $g_9$     | $3.757 * 10^{-5}$  | $5.234 * 10^{-3}$  | $5.185 * 10^{-8}$  | $9.378 * 10$       |
| $g_{10}$  | $6.242 * 10^{-5}$  | $9.338 * 10^{-6}$  | $5.537 * 10^{-6}$  | $5.110 * 10^{-8}$  |
| $g_{11}$  | $2.183 * 10^8$     | $5.064 * 10^{10}$  | $7.624 * 10^6$     | $4.565 * 10^9$     |
| $g_{12}$  | $3.229 * 10^{-8}$  | $1.542 * 10^{-11}$ | $1.930 * 10^{-10}$ | $7.116 * 10^{-9}$  |
| $g_{13}$  | $8.733 * 10^6$     | $2.273 * 10^7$     | $4.689 * 10^7$     | $9.747 * 10^5$     |
| $g_{14}$  | $5.981 * 10^3$     | $4.809 * 10^9$     | $4.799 * 10^{10}$  | $3.855 * 10^4$     |
| $g_{15}$  | $3.068 * 10^9$     | $7.927 * 10^5$     | $8.642 * 10^3$     | $5.392 * 10^6$     |
| $r_1$     | $2.140 * 10^{-10}$ | $2.448 * 10^{-2}$  | $6.718 * 10^{-2}$  | $7.260 * 10^{-5}$  |
| $r_2$     | 8.065              | $2.780 * 10^{-4}$  | $3.394 * 10^{-9}$  | $2.793 * 10^{-6}$  |
